# Supplementary material for: Tetrazole derivatives synthesis via green one-pot oxidation of benzyl alcohol using Cu( ii ) immobilized on nanodiamond@folic acid catalyst
Source: Royal Society of Chemistry journal article supplement (doi:10.1039/d5ra03496e), 2025-01-01
Supplement: d5ra03496e1.pdf [file d5ra03496e1.pdf]

## Supporting Information

### Synthesis of tetrazole derivatives via green one-pot oxidation of benzyl alcohol using Cu(II) immobilized on nanodiamond@folic acid catalyst

Arezoo Ramezani <sup>a</sup>, Reza Ghalavand <sup>a</sup>, Zahra Nasri <sup>a</sup>, Hossein Ghafuri <sup>a\*</sup>

<sup>a</sup>*Catalysts and Organic Synthesis Research Laboratory, Department of Chemistry, Iran University of Science and Technology, Tehran 16846-13114, Iran*

\*Corresponding author E-mail: [ghafuri@iust.ac.ir](mailto:ghafuri@iust.ac.ir); Fax: +98-21-77491204; Tel: +98-21-77240516-7

---

#### Table of Contents

|    |                                                                                       |    |
|----|---------------------------------------------------------------------------------------|----|
| 1. | Title article and title page.....                                                     | S1 |
| 2. | FT-IR spectrum of recycled ND@FA-Cu(II) nanocatalyst (Figure S1) .....                | S3 |
| 3. | EDS analysis of recycled ND@FA-Cu(II) nanocatalyst (Figure S2).....                   | S4 |
| 4. | IR spectra of compound <b>4d</b> (Figure S3).....                                     | S5 |
| 5. | <sup>1</sup> H and <sup>13</sup> C NMR spectra of compound <b>4d</b> (Figure S4)..... | S6 |

---

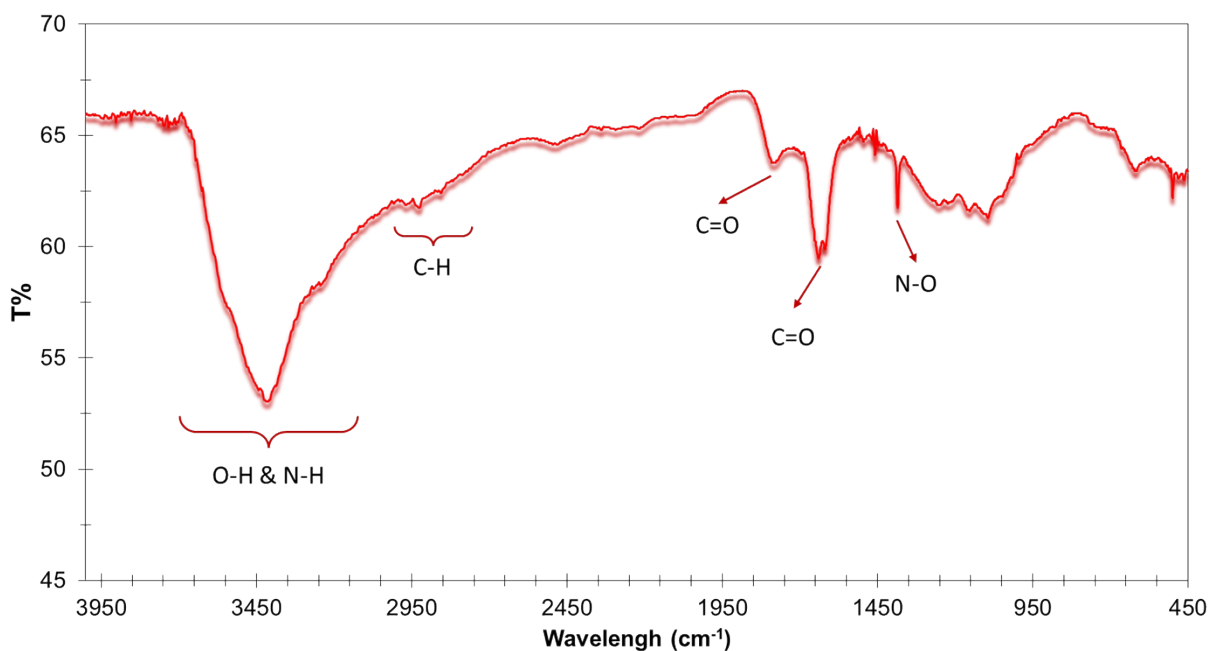

**Figure S1.** FT-IR spectrum of recycled ND@FA-Cu(II) nanocatalyst.

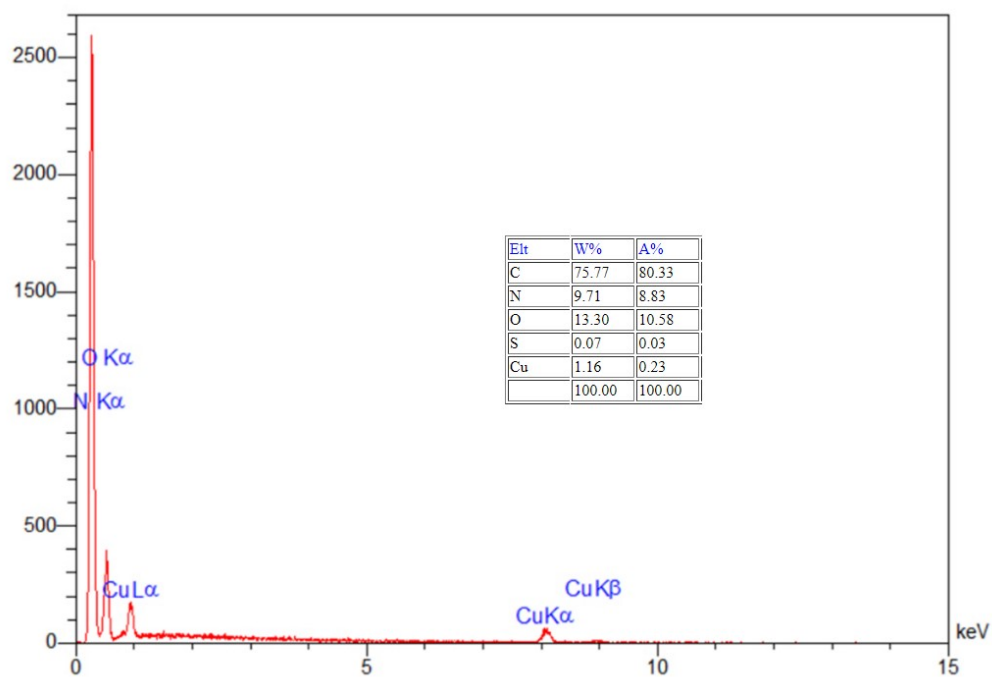

**Figure S2.** EDS analysis of recycled ND@FA-Cu(II) nanocatalyst.

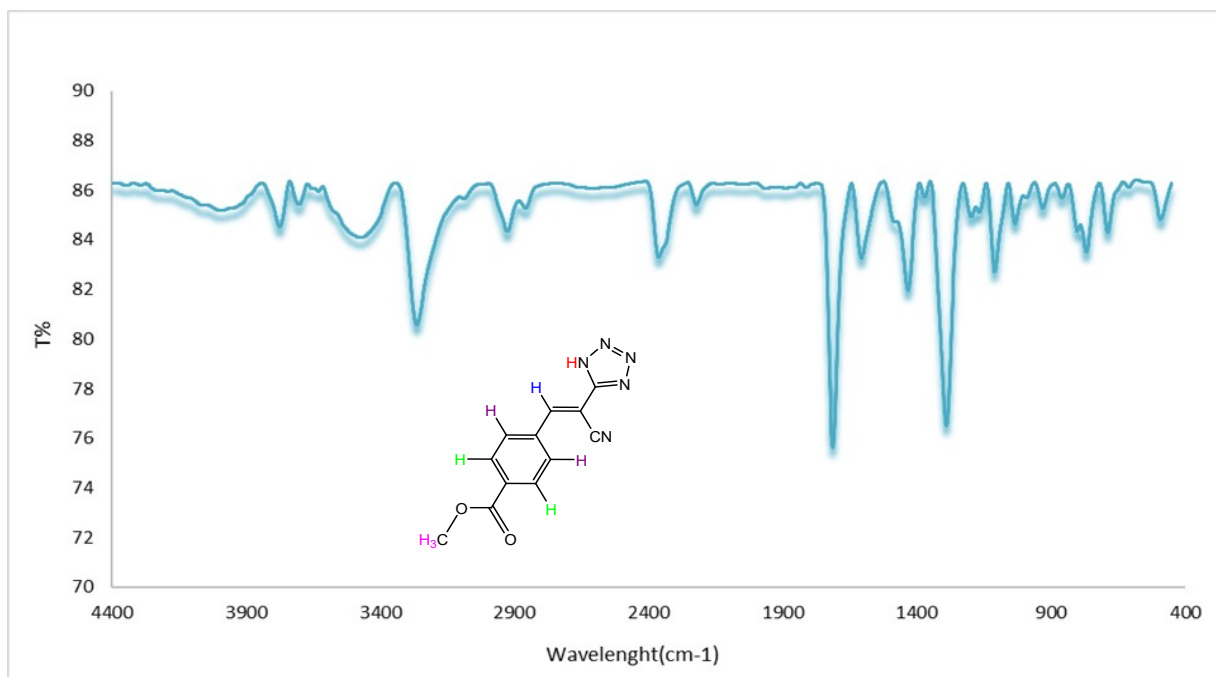

**Figure S3.** IR spectrum of compound (**4d**)

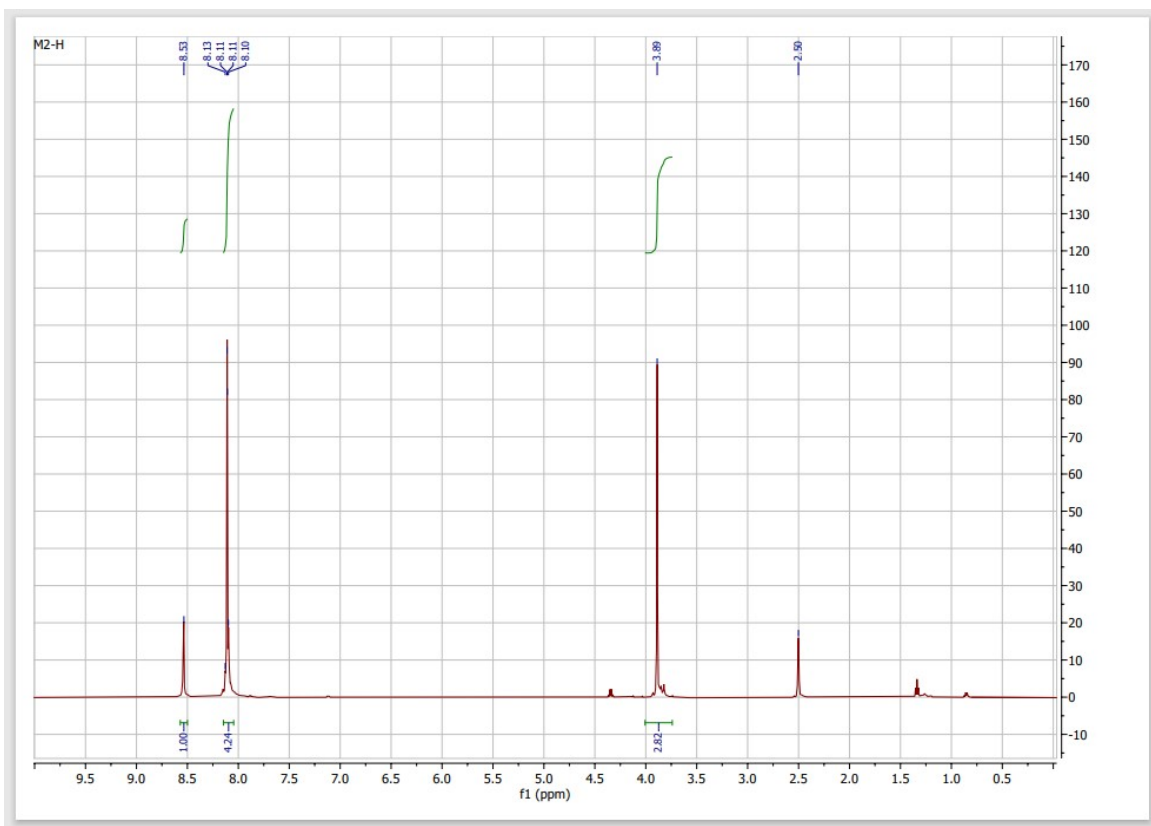

**Figure S4.**  $^1\text{H}$  NMR spectrum of compound (4d)

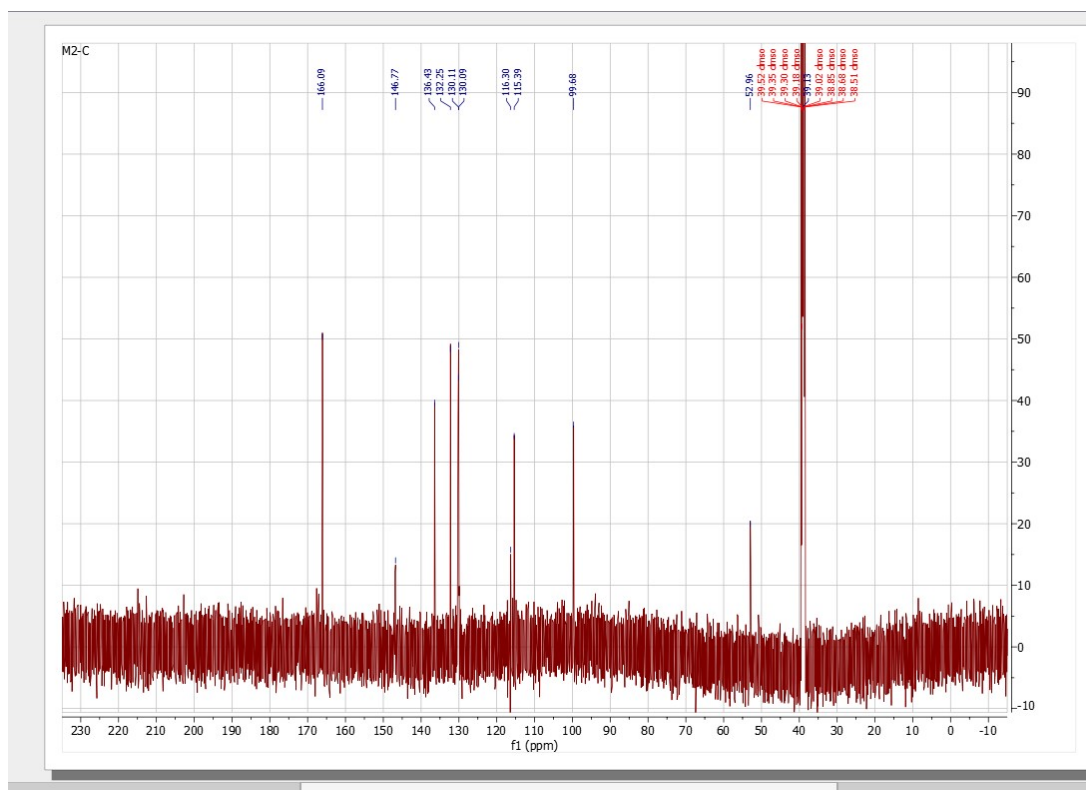

**Figure S5.** <sup>13</sup>C NMR spectrum of compound (4d)
